# Supplementary material for: Prevalence of functional constipation among Palestinian preschool children and the relation to stressful life events
Source: PubMed Central journal article supplement (PMC6283531; doi:10.1371/journal.pone.0208571), 2018-12-06
Supplement: pone.0208571.s002.pdf [file pone.0208571.s002.pdf]

تقييم للإمساك والمغص بين أطفال اللاجئين الفلسطينيين

الذين تتراوح أعمارهم بين 7 شهور الى 4 سنوات

التاريخ: \_\_\_\_\_ رقم ملف الطفل الصحي: \_\_\_\_\_  
إسم العيادة الصحية: \_\_\_\_\_  
الأقليم: \_\_\_\_\_ الاردن \_\_\_\_\_ الضفة الغربية \_\_\_\_\_ غزة \_\_\_\_\_  
الفئة العمرية:

7-12 mon 0  
13-24 mon 0  
25-36 mon 0  
37-48 mon 0

الجزء الاول والثاني من الاستبيان يتم تعبئته بواسطة الباحث عن طريق مقابلة الأم بينما يستكمل الجزء الثالث والرابع من الاستبيان بواسطة الأم شخصيا

1. الجزء الاول

معلومات حول الطفل:

1. الاسم: .....
2. تاريخ الميلاد: .....
3. الجنس:  ذكر  أنثى
4. كم عدد الأخوة والأخوات: عدد الأخوات ..... عدد الأخوة .....
5. ما هو ترتيب الطفل في العائلة: .....
6. الوزن الحالي: ..... غرام
7. الطول الحالي : ..... سم

8. (أ) منحنى النمو (انظر منحنى النمو للطفل):  طبيعي  يعاني من مشاكل في النمو

(ب) إذا كان الجواب يعاني من مشاكل, انظر لمنحنى النمو

1. \_\_\_\_\_ سمنة ( $>2SD$ ) منحنى الوزن الطول
2. \_\_\_\_\_ ناقص وزن ( $<2SD$ ) منحنى الوزن العمر
3. \_\_\_\_\_ تقزم ( $<2SD$ ) منحنى الطول العمر
4. \_\_\_\_\_ نحول ( $<2SD$ ) منحنى الوزن الطول

9. التاريخ الطبي العام: .....

10. هل يتطور نمو طفلك العقلي طبيعياً: \_\_\_ لا \_\_\_ نعم

II. الجزء الثاني

هذا القسم يسأل عن حركة أمعاء طفلك خلال الشهرين الماضيين. وهناك العديد من الكلمات لحركة الأمعاء، مثل "الخروج"، "البراز"، "عائلتك قد تستخدم كلمة أخرى خاصة عندما يتحدثون عن البراز.

11. خلال الشهرين الماضيين، عادة كم مرة طفلك يذهب للحمام للتبرز؟

1. \_\_\_ مرتان في الاسبوع أو أقل (اكمل للسؤال رقم 12)
2. \_\_\_ من 3 الى 6 مرات في الاسبوع
3. \_\_\_ مرة في اليوم
4. \_\_\_ من 2 الى 3 مرات في اليوم
5. \_\_\_ اكثر من 3 مرات في اليوم
- (اكمل للسؤال رقم 13)

12. منذ متى طفلك لديه يتبرز بمعدل مرتين أو أقل في الاسبوع؟

1. \_\_\_ منذ أقل من شهرين
2. \_\_\_ منذ 2 6 أشهر
3. \_\_\_ منذ 6 اشهر الى سنة
4. \_\_\_ منذ 1 2 سنوات
5. \_\_\_ منذ 2 3 سنوات
6. \_\_\_ منذ 3 4 سنوات

13. خلال الشهرين الماضيين، ما هو قوام براز طفلك؟ (اظهار الصور)

1. النوع الأول: قاسي جدا (الكتل الصلبة منفصلة)
2. النوع الثاني: صلب جاف
3. النوع الثالث: صلب عقدي
4. النوع الرابع: سلس وناعم
5. النوع الخامس: ناعم جدا ونقطي
6. النوع السادس: طري ومتصل
7. النوع السابع: مائي
8. يعتمد (برازه او برازها ليس متشابه دائما)

14. خلال الشهرين الماضيين، هل يعاني طفلك من الألم عند التبرز؟

1. \_\_\_ لا ابدا
2. \_\_\_ مرة في الشهرين
3. \_\_\_ من 1 3 مرات في الشهر
4. \_\_\_ مرة في الاسبوع
5. \_\_\_ اكثر من مرة في الاسبوع

6. \_\_\_ كل يوم

15. خلال الشهرين الماضيين، هل لدى طفلك اي تعسر (بذل مجهود) خلال حركة عملية التبرز؟

1. \_\_\_ لا ابدا

2. \_\_\_ مرة في الشهرين

3. \_\_\_ من 1 3 مرات في الشهر

4. \_\_\_ مرة في الاسبوع

5. \_\_\_ اكثر من مرة في الاسبوع

6. \_\_\_ كل يوم

16. في الشهرين الماضيين، هل كان لدى طفلك براز وكان كبير جداً مما ادى الى انسداد المرحاض؟ (في الحجم والقطر)

1. \_\_\_ لا

2. \_\_\_ نعم

17. بعض الأطفال لديهم عقدة التبرز حتى عندما يتوفر المرحاض. قديفعلون ذلك بشد أجسادهم أو عقد أرجلهم. خلال الشهرين الماضيين , عندما يكون طفلك في المنزل، كم مرة عانى طفلك من عقدة التبرز؟

1. \_\_\_ لا ابدا

2. \_\_\_ مرة في الشهرين

3. \_\_\_ من مرة الى 3 مرات في الشهر

4. \_\_\_ مرة في الاسبوع

5. \_\_\_ أكثر من مرة في الاسبوع

6. \_\_\_ كل يوم

18. أ) هل تم تدريب الطفل على استعمال المرحاض في المنزل وفي خارج المنزل؟

1. \_\_\_ لا (اكمل الى السؤال 21)

2. \_\_\_ لا، فقط في البيت (اكمل الى السؤال 21)

3. \_\_\_ نعم

ب) اذا الجواب نعم في اي عمر بالاشهر بدأ الطفل باستعمال المرحاض بدلا من الحفاضات؟..... شهر

19. خلال الشهرين الماضيين للاطفال الذين اصبحوا نظيفين ويستعملون المرحاض، كم

مرة عانى طفلك من اتساخ ملابسه الداخلية بالبراز؟

1. \_\_\_ لا ابدا

2. \_\_\_ مرة في الشهرين

3. \_\_\_ من 1 3 مرات في الشهر  
 4. \_\_\_ مرة في الاسبوع  
 5. \_\_\_ اكثر من مرة في الاسبوع  
 6. \_\_\_ كل يوم

20. خلال اليوم, للاطفال الذين اصبحوا نظيفين ويستعملون المرحاض،  
 كم مرة عانى طفلك من اتساخ ملبسه الداخلية بالبول؟

1. \_\_\_ لا ابدا  
 2. \_\_\_ مرة في الشهرين  
 3. \_\_\_ من مرة الى 3 مرات في الشهر  
 4. \_\_\_ مرة في الاسبوع  
 5. \_\_\_ اكثر من مرة في الاسبوع  
 6. \_\_\_ كل يوم

21. خلال الشهرين الماضيين، كم مرة يخرج دم مع البراز؟

1. \_\_\_ لا ابدا  
 2. \_\_\_ مرة في الشهرين  
 3. \_\_\_ من مرة الى 3 مرات في الشهر  
 4. \_\_\_ مرة في الاسبوع  
 5. \_\_\_ اكثر من مرة في الاسبوع  
 6. \_\_\_ كل يوم

خلال الشهرين الماضيين، هل عانى طفلك من الاعراض المذكورة ادناه ؟

22. الم في البطن \_\_\_ لا \_\_\_ نعم  
 23. تقيئ \_\_\_ لا \_\_\_ نعم  
 24. فقدان شهية \_\_\_ لا \_\_\_ نعم  
 25. فقدان وزن \_\_\_ لا \_\_\_ نعم

26. هل برايك أن عادات التبرز عند طفلك يسبب له مشكلة؟

1. \_\_\_ لا  
 2. \_\_\_ نعم

27. هل تم فحص طفلك من قبل طبيب او ممرضة وتم إعلامك بأن طفلك لديه براز

كثير داخله؟

1. \_\_\_ لا  
 2. \_\_\_ نعم

28. (أ) هل زرت في اي وقت مضى مركز الاونروا الصحي لان طفلك يعاني من مشاكل في البراز؟

1. \_\_\_ نعم

2. \_\_\_ لا، ذهبنا الى عيادة او مستشفى اخر

3. \_\_\_ لا

(ب) اذا كان الجواب نعم، في أي عمر بالاشهر؟.....شهر

(ج) اذا كان الجواب نعم، ما هي الفحوصات التي تمت من قبل الطبيب او الممرضة (والمزيد من الاجابات الممكنة)

1. \_\_\_ فحص البطن

2. \_\_\_ فحص فتحة الشرج من الداخل والخارج

3. \_\_\_ فحوصات دم:.....

4. \_\_\_ اشعة:.....

5. \_\_\_ التراساوند:.....

6. \_\_\_ اخرى, حدد/ي :.....

7. \_\_\_ لا فحوصات

29. (أ) في اي وقت مضى هل تمت معالجة طفلك بسبب الامساك من قبل طبيب او ممرضة الاونروا؟

1. \_\_\_ نعم

2. \_\_\_ لا

3. \_\_\_ لا، تمت معالجته ذاتيا او نصيحة الصيدلانية

(ب) المعالجة تتضمن (المزيد من الاجابات الممكنة)

1. \_\_\_ تقديم المشورة الغذائية

a. \_\_\_ أكل الياف اكثر

b. \_\_\_ أكل فواكه اكثر

c. \_\_\_ شرب ماء اكثر

d. \_\_\_ اخرى.....

2. \_\_\_ تقديم المشورة في سلوك الطفل

a. \_\_\_ تدريب على استعمال كيبنة الاطفال

b. \_\_\_ العقاب

c. \_\_\_ المكافأة

d. \_\_\_ اخرى

3. \_\_\_ المسهلات عن طريق الفم

a. \_\_\_ حبوب نوع.....

b. \_\_\_ شراب نوع.....

.....c. \_\_\_ بودرة نوع.....

4. \_\_\_ مسهلات عن طريق الشرج

a. \_\_\_ غلserin تحاميل

b. \_\_\_ تحاميل أخرى

c. \_\_\_ حقنة شرجية

.....5. \_\_\_ اعشاب طبية , حدداي .....

.....6. \_\_\_ أخرى , حدداي.....

30. خلال السنة الماضية، هل تعرضت الى اي عنف اسري (جسدي أو لفظي) في المنزل؟

1. \_\_\_ لا أبدا
2. \_\_\_ مرة واحدة في السنة
3. \_\_\_ أكثر من مرة في السنة
4. \_\_\_ مرة واحدة في الشهر
5. \_\_\_ أكثر من مرة في الشهر
6. \_\_\_ مرة في الاسبوع
7. \_\_\_ أكثر من مرة في الاسبوع
8. \_\_\_ كل يوم

31 خلال السنة الماضية، هل تعرض طفلك الى اي عنف اسري (جسدي أو لفظي) في المنزل؟

1. \_\_\_ لا أبدا
2. \_\_\_ مرة واحدة في السنة
3. \_\_\_ أكثر من مرة في السنة
4. \_\_\_ مرة واحدة في الشهر
5. \_\_\_ أكثر من مرة في الشهر
6. \_\_\_ مرة في الاسبوع
7. \_\_\_ أكثر من مرة في الاسبوع
8. \_\_\_ كل يوم

## الفئة العمرية:

|           |   |
|-----------|---|
| 7-12 mon  | 0 |
| 13-24 mon | 0 |
| 25-36 mon | 0 |
| 37-48 mon | 0 |

## .III الجزء الثالث: معلومات عن العائلة

|          |                               |
|----------|-------------------------------|
| سنة..... | 32. عمر الأم.....             |
| سنة..... | 33. عمر الأم عند الزواج.....  |
| سنة..... | 34. عدد سنوات دراسة الأم..... |

## 35. عمل الأم:

1. لا يعمل
2. عامل غير ماهر
3. عامل ماهر
4. موظف مؤسسة أو دائرة حكومية
5. تاجر
6. حامل شهادة يعمل بها
7. وظيفة أخرى.....

|          |                               |
|----------|-------------------------------|
| سنة..... | 36. عمر الأب.....             |
| سنة..... | 37. عمر الاب عند الزواج.....  |
| سنة..... | 38. عدد سنوات دراسة الاب..... |

## 39. عمل الأب:

1. لا يعمل
2. عامل غير ماهر
3. عامل ماهر
4. موظف مؤسسة أو دائرة حكومية
5. تاجر
6. حامل شهادة يعمل بها
7. وظيفة أخرى.....

## 40. دخل العائلة:

الاردن:

1. اقل من 300 JD
2. من 300 500 JD
3. اكثر من 500 JD

الضفة الغربية, غزة:

1. اقل من 1500 شيكل

2. 1500 2500 شيكل

3. اكثر من 2500 شيكل

41. هل تشعر ان دخلك كافي لحاجاتك الاساسية وحاجات عائلتك؟

1. لا \_\_\_

2. نعم \_\_\_

42. هل تتحمل عائلتك أي ديون مالية؟

1. لا \_\_\_

2. نعم \_\_\_

43. كيف علاقتك مع زوجك؟

1. جيد جدا

2. جيد

3. سيء

4. سيء جدا

44. كيف علاقتك مع افراد الاسرة الاخرين (أمك ,أبوك,حماك,حماتك, أخوة)الذين يعيشون

معكم في البيت؟

1. جيد جدا

2. جيد

3. سيء

4. سيء جدا

5. لا يسكن معنا أحد من أفراد الاسرة

45. مكان السكن:

1. مخيم لاجئين

2. المدينة

3. منطقة ريفية او قرية

46. أ) هل كانت عائلتك مجبرة على تغيير مكان إقامتها بسبب الوضع الأمني أو لأسباب

أخرى؟

1. لا \_\_\_

2. نعم \_\_\_

ب) اذا كان الجواب نعم \_\_\_ حددا ي أي سنة \_\_\_



## .IV. الجزء الرابع: معلومات حول التعرض لأحداث مؤلمة

هل تعرض طفلك لأي من الأحداث التالية خلال أي وقت في حياته؟

يرجى الإجابة بنعم أو لا لكل سؤال

47. شاهد طفلك جنث مشوهة ومجروحة على التلفزيون  
 \_\_\_ لا \_\_\_ نعم
48. شاهد طفلك غارات نهارية على منزلك  
 \_\_\_ لا \_\_\_ نعم
49. شاهد طفلك غارات ليلية على منزلك  
 \_\_\_ لا \_\_\_ نعم
50. شاهد طفلك أو سمع إطلاق نار بالدبابات والمدفعية الثقيلة  
 على منزلك  
 \_\_\_ لا \_\_\_ نعم
51. شاهد طفلك أو سمع هدم منزلك  
 \_\_\_ لا \_\_\_ نعم
52. شاهد طفلك أو سمع إطلاق نار على احد أقربائك  
 \_\_\_ لا \_\_\_ نعم
53. شاهد طفلك أو سمع ضرب احد اقربائك  
 \_\_\_ لا \_\_\_ نعم
54. سمع طفلك قتل احد أقربائك  
 \_\_\_ لا \_\_\_ نعم
55. شاهد طفلك قتل احد اقربائك  
 \_\_\_ لا \_\_\_ نعم
56. شاهد طفلك أو سمع اعتقال احد أقربائك  
 \_\_\_ لا \_\_\_ نعم
57. شاهد طفلك أو سمع إطلاق نار بالدبابات والمدفعية الثقيلة  
 على منزل جيرانك  
 \_\_\_ لا \_\_\_ نعم
58. شاهد طفلك أو سمع إطلاق نار على احد من جيرانك  
 \_\_\_ لا \_\_\_ نعم
59. سمع طفلك قتل احد جيرانك  
 \_\_\_ لا \_\_\_ نعم
60. شاهد طفلك قتل احد جيرانك  
 \_\_\_ لا \_\_\_ نعم
61. شاهد طفلك أو سمع هدم بيت احد أصدقائك  
 \_\_\_ لا \_\_\_ نعم
62. شاهد طفلك أو سمع ضرب احد أصدقائك  
 \_\_\_ لا \_\_\_ نعم
63. شاهد طفلك أو سمع قصف منازل بطائرات عادية أو طائرات هليكوبتر أو طائرة بدون  
 طيار  
 \_\_\_ لا \_\_\_ نعم
